# Supplementary material for: A Novel and Noninvasive Risk Assessment Score and Its Child-to-Adult Trajectories to Screen Subclinical Renal Damage in Middle Age
Source: MDPI journal article supplement (doi:10.3390/bioengineering10020257), 2023-02-15
Supplement: s1 [file s1]

Supplementary Materials

# A Novel and Noninvasive Risk Assessment Score and Its Child-to-Adult Trajectories to Screen Subclinical Renal Damage in Middle Age

Chen Chen <sup>1,2</sup>, Guanzhi Liu <sup>3</sup>, Chao Chu <sup>1,2</sup>, Wenling Zheng <sup>1,2</sup>, Qiong Ma <sup>1,2</sup>, Yueyuan Liao <sup>1,2</sup>, Yu Yan <sup>1,2</sup>, Yue Sun <sup>1,2</sup>, Dan Wang <sup>1,2</sup>, Jianjun Mu <sup>1,2,\*</sup>

<sup>1</sup> Department of Cardiovascular Medicine, First Affiliated Hospital of Xi'an Jiaotong University, Xi'an 710061 China

<sup>2</sup> Key Laboratory of Molecular Cardiology of Shaanxi Province, Xi'an 710061, China

<sup>3</sup> Department of Orthopedics, The First Affiliated Hospital, Zhejiang University School of Medicine, Hangzhou 310009, China

\* Correspondence: mujun@mail.xjtu.edu.cn

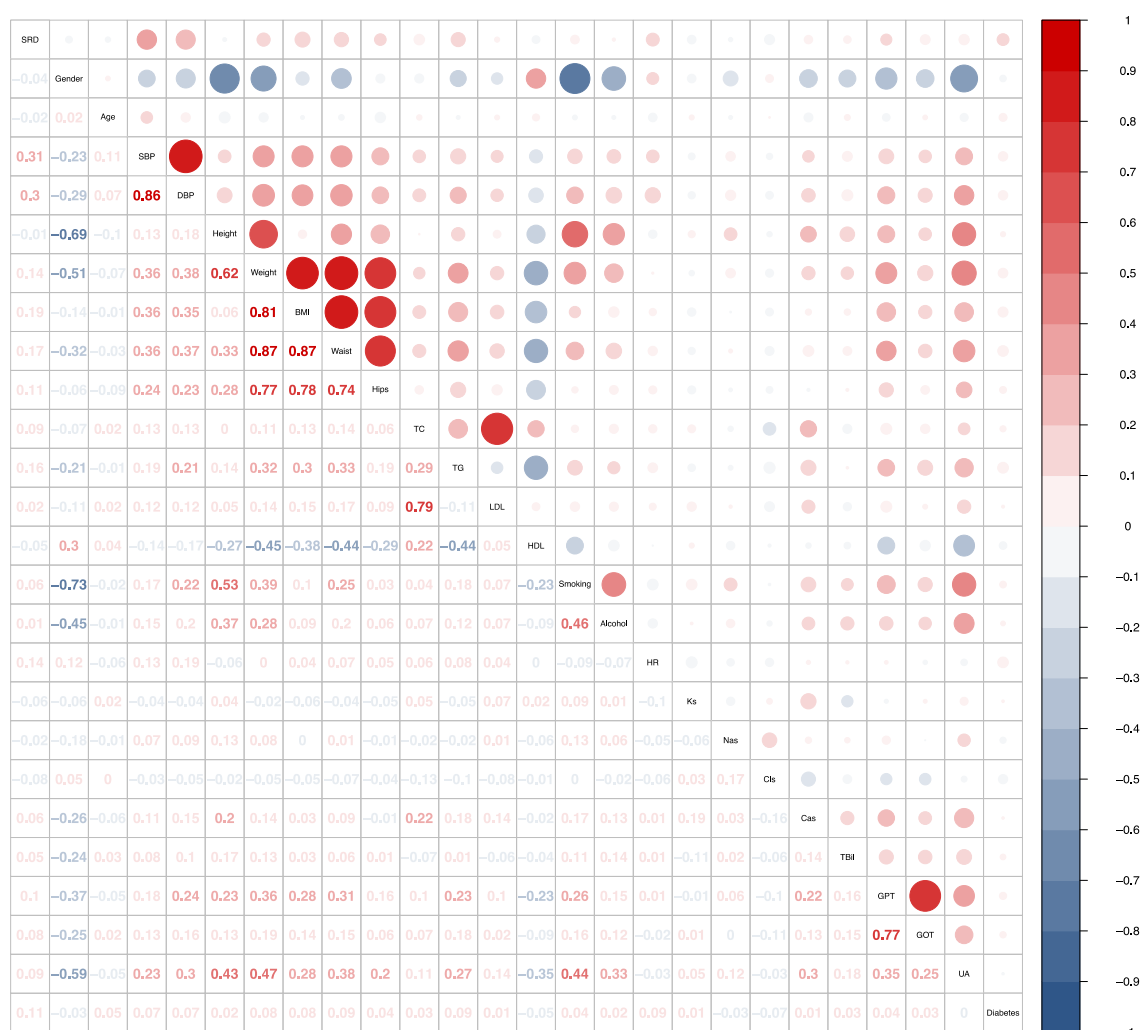

Figure S1. Heat map for the correlation between SRD-associated variables.
